# Supplementary material for: Li+-assisted treatment of graphene oxide for ultrahigh volumetric performance supercapacitors
Source: Royal Society of Chemistry journal article supplement (doi:10.1039/d2ta00767c), 2022-01-01
Supplement: d2ta00767c1.pdf [file d2ta00767c1.pdf]

## Supporting Information

### **Li<sup>+</sup>-assisted treatment of graphene oxide for ultrahigh volumetric performance supercapacitor**

Zhaoyuan Liu,<sup>ab</sup> Yue Yang,<sup>c</sup> Yinan Yuan,<sup>d</sup> Lidong Wang,<sup>\*a</sup> Jie Sheng,<sup>\*e</sup> Weidong Fei<sup>af</sup>

*<sup>a</sup>School of Materials Science and Engineering, Harbin Institute of Technology, Harbin 150001, P. R. China. E-mail: [wld@hit.edu.cn](mailto:wld@hit.edu.cn), [shengjie@hit.edu.cn](mailto:shengjie@hit.edu.cn)*

*<sup>b</sup>College of Chemistry and Chemical Engineering, Harbin Normal University, Harbin 150025, P. R. China.*

*<sup>c</sup>Harbin Welding Institute Limited Company, Harbin 150028, P. R. China.*

*<sup>d</sup>School of Environmental and Chemical Engineering, Heilongjiang University of Science and Technology, Harbin 150022, P. R. China.*

*<sup>e</sup>Laboratory for Space Environment and Physical Science, Research Center of Basic Space Science, Harbin Institute of Technology, Harbin 150001, P. R. China.*

*<sup>f</sup>State Key Laboratory of Advanced Welding and Joining, Harbin Institute of Technology, Harbin 150001, P. R. China.*

## Experimental section

*Synthesis of materials:* Graphite oxide was synthesized using a modified Hummers method 1. Natural graphite powder with an average size of 44  $\mu\text{m}$  was purchased from Qingdao Jinrilai Graphite Co., Ltd. Briefly, a volume ratio of 9:1 mixture of concentrated  $\text{H}_2\text{SO}_4$  (98%, 90 mL) and  $\text{H}_3\text{PO}_4$  (85%, 10 mL) was added to the nature graphite powder (2 g) in ice-water bath.  $\text{KMnO}_4$  (14 g) was gradually added with magnetic stirring, then the reactants were heated to 50  $^\circ\text{C}$  and stirred for 10 h. The reactants were cooled down to room temperature and distilled water (50 mL) was slowly added to cause an increase in temperature up to 95  $^\circ\text{C}$ , holding for 15 min and then a large amount of distilled water (450 mL) and 30%  $\text{H}_2\text{O}_2$  solution (5 mL) were added to the reaction system. The product was washed by diluted hydrochloric acid and deionized water for several times. The GO colloid solution was vacuum-dried at 80  $^\circ\text{C}$  for 12 h and denoted as GO-80.

*Li<sup>+</sup>-assisted heat treatment process:* GO suspension (2 mg mL<sup>-1</sup>, 100 mL) was treated by sonication for 2 h and then mixed with metal cationic chlorides LiCl. An appropriate amount of LiCl was added to the GO solution under the condition of magnetic stirring, so that the concentration of LiCl in the solution reached 3.5 mol L<sup>-1</sup>. The solid-liquid separation was accomplished by centrifugation at 11 000 rpm for 15 min, and the precipitate was dried under vacuum (100  $^\circ\text{C}$ , 12 h). The dried powder was put into a tube furnace and heat-treated at 400  $^\circ\text{C}$  in an argon protective atmosphere for 60 min, with a heating rate of 10  $^\circ\text{C min}^{-1}$  and a gas flow rate of 100 mL min<sup>-1</sup>. The obtained sample was washed for 4 times by the mixture of water and ethanol (water/ethanol = 60/40 vol. %) and dried at 80  $^\circ\text{C}$  for 4 h. The obtained reduced graphene oxide was named as Li-RGO-400. As a comparison, GO was also heat treated without LiCl, the obtained sample denoted as Ar-RGO-400. To investigate the influence of heat treatment temperature, 100  $^\circ\text{C}$ , 200  $^\circ\text{C}$ , 300  $^\circ\text{C}$ , 500  $^\circ\text{C}$  and 600  $^\circ\text{C}$  were also selected to carry out the Li<sup>+</sup>-assisted heat treatment process.

*Characterizations:* The microstructure and morphology were examined by environmental scanning electron microscopy (ESEM, Zeiss Merlin Compact) and high-resolution transmission electron microscopy (HRTEM, JEM-2100F). The X-ray photoelectron spectroscopy (XPS) characterization of the products was executed on Thermo Fisher Scientific Esca Xi<sup>+</sup> spectrometer with an Al K $\alpha$  ( $h\nu=1486.69$  eV) X-ray source. The powder X-ray diffraction (XRD) measurements were carried out on a Philips X'pert diffractometer with Cu K $\alpha$  irradiation ( $\lambda=1.54$  Å). The Raman spectra were recorded using a B&WTEK spectrometer (BWS435-532SY) with a 532 nm laser ( $h\nu=2.34$  eV), 2% laser power (total power: 240 mW). The FTIR spectra were recorded in KBr pellets using a WQF-530 FTIR spectrometer in the wavenumber region 4000 to 400 cm<sup>-1</sup>. The N<sub>2</sub> adsorption/desorption isotherms were measured using an ASAP2460/Autochem2920 analyzer. The specific surface area and pore size distribution were determined by Brunauer-Emmett-Teller (BET) and Barrett-Joyner-Halenda (BJH) desorption analyses, respectively. The packing density  $\rho$  of RGOs was calculated through the following equation 2, 3:

$$\rho = \left( V_{\text{total}} + 1/\rho_{\text{carbon}} \right)^{-1} \quad \backslash * \text{MERGEFORMAT (1)}$$

where  $\rho$  is the packing density of the materials and the  $\rho_{\text{carbon}}$  is the true density of carbon (2 g cm<sup>-3</sup>),  $V_{\text{total}}$  is the total pore volume estimated from N<sub>2</sub> isotherm at 77 K.

*Electrochemical measurements:* The electrochemical experiments were carried out using a conventional three- and two-electrode system with an aqueous system (electrolyte: 1 M H<sub>2</sub>SO<sub>4</sub>) using CHI760D electrochemical workstation. Three-electrode cells were used to evaluate the Faradaic processes and the available potential window, and two-electrode cells were constructed to simulate actual device behavior. The working electrode was prepared by mixing the active materials with polyvinylidene fluoride (PVDF) and acetylene black with a weight ratio of 80:10:10 in N-methyl-2-pyrrolidone (NMP) until homogeneous slurry was formed. The as-prepared slurry was dropped onto the stainless-steel mesh (300 mesh) with areal

of 1 cm<sup>2</sup>, with active mass loading of 2~3 mg cm<sup>-2</sup>. The electrode was dried at 120 °C in a vacuum oven for 10 h. After then, the electrode was pressed under 10 MPa for 2 minutes to improve the packing density. The Ag/AgCl (KCl<sub>sat.</sub>) electrode and a slice of platinum served as reference and counter electrodes, respectively. For all the samples, before formally starting the electrochemical test, the activation was performed at the scan rate of 100 mV s<sup>-1</sup> for 200 cycles to stabilize the electrode. The cyclic voltammetry (CV) tests were investigated between -0.2 V and 0.9 V (vs. Ag/AgCl). The galvanostatic charge/discharge (GCD) was performed in the same potential range at the current densities ranging from 0.1 to 50 A g<sup>-1</sup>. GCD was assumed to be the most accurate technique especially for redox supercapacitor. The electrochemical impedance spectroscopy (EIS) measurements were evaluated in the frequency range from 100 kHz to 0.01 Hz at open circuit potential with an ac perturbation of 5 mV. The simulation of the experiment impedance using three-electrode data was carried out with Zview software.

*Fabrication of supercapacitors:* As for the fabrication of the two-electrode symmetric supercapacitor systems, two electrodes with exactly the same mass were assembled in CR2025 stainless steel coin-type cells with the porous cellulose membrane as separator and 1 M H<sub>2</sub>SO<sub>4</sub> aqueous solution as electrolyte.

*Calculation of the specific capacitances:* The measured specific capacitance of the current collector (stainless-steel mesh) is about 0.064 F g<sup>-1</sup> @ 5 mV s<sup>-1</sup>, which is much less than the typical capacitance of graphene (50 ~ 300 F g<sup>-1</sup>). Therefore, the influence of current collector is neglectable.

#### (1) Three-electrode configuration

The gravimetric specific capacitances based on the active material ( $C_g$ , F g<sup>-1</sup>) were calculated according to the GCD curves at different current densities:

$$C_g = \frac{I\Delta t}{m\Delta U} \quad \backslash * \text{MERGEFORMAT (2)}$$

where  $I$  is the discharge current (A),  $\Delta t$  is the discharge time (s),  $m$  is the weight of the active

material (g), and  $\Delta U$  is the discharge voltage (V) excluding the internal resistance ( $iR$ ) drop during the discharge process.

The volumetric performances of the active materials ( $C_V$ , F cm<sup>-3</sup>) were calculated according to the following equation:

$$C_V = C_g \rho \quad \backslash * \text{MERGEFORMAT (3)}$$

where  $C_g$  presents the gravimetric capacitance of the active material,  $\rho$  is the packing density (g cm<sup>-3</sup>) of the active material.

## (2) Two-electrode configuration

The gravimetric specific capacitance of the device was calculated by the following equation:

$$C_{g-2e} = \frac{I\Delta t}{2m\Delta U} \quad \backslash * \text{MERGEFORMAT (4)}$$

where  $I$  is the discharge current (A),  $\Delta t$  is the discharge time (s),  $m$  is the weight of the active material in the individual electrode (g), and  $\Delta U$  is the discharge voltage (V) excluding the  $iR$  drop during the discharge process.

The energy densities ( $E$ ) and power density ( $P$ ) of the symmetric cell were estimated according to the following equation:

$$E = \frac{1}{2} C \times \Delta U^2 \quad \backslash * \text{MERGEFORMAT (5)}$$

$$P = \frac{E}{t} \quad \backslash * \text{MERGEFORMAT (6)}$$

Where  $C$  represents the gravimetric/areal/volumetric capacitance based on the two-electrode system.  $\Delta U$  is the discharge voltage excluding the  $iR$  drop during the discharge process, and  $t$  is the discharging time measured in the galvanostatic charging and discharging experiments.

*Calculation of the coulombic efficiency and energy efficiency:* The coulombic efficiency ( $\eta_c$ ) was calculated by the following equation:

$$\eta_c = \frac{t_D}{t_C} \times 100\% \quad \backslash * \text{MERGEFORMAT (7)}$$

Where  $t_D$  and  $t_C$  is the discharge duration time and charge duration time.

The energy efficiency ( $\eta_e$ ) was calculated by the following equation:

$$\eta_e = \frac{E_D}{E_C} \times 100\% \quad \backslash * \text{MERGEFORMAT (8)}$$

where  $E_D$  is discharge specific energy obtained by discharge curve integrating and  $E_C$  is charge specific energy obtained by charge curve integrating, as shown in the following equations

$$E_D = I \int U(t_D) dt_D \quad \backslash * \text{MERGEFORMAT (9)}$$

$$E_C = I \int U(t_C) dt_C \quad \backslash * \text{MERGEFORMAT (10)}$$

**Supplementary Fig. S1-Fig. S19 and Table S1-Table S5**

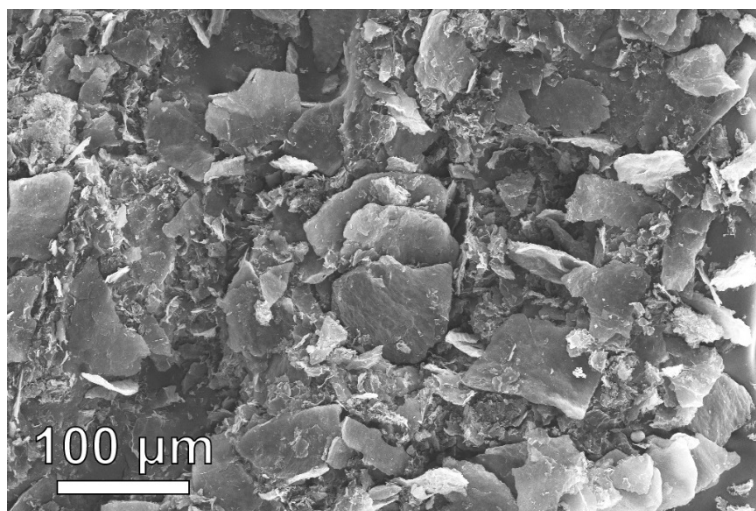

Fig. S1 The SEM image of Li-RGO-400.

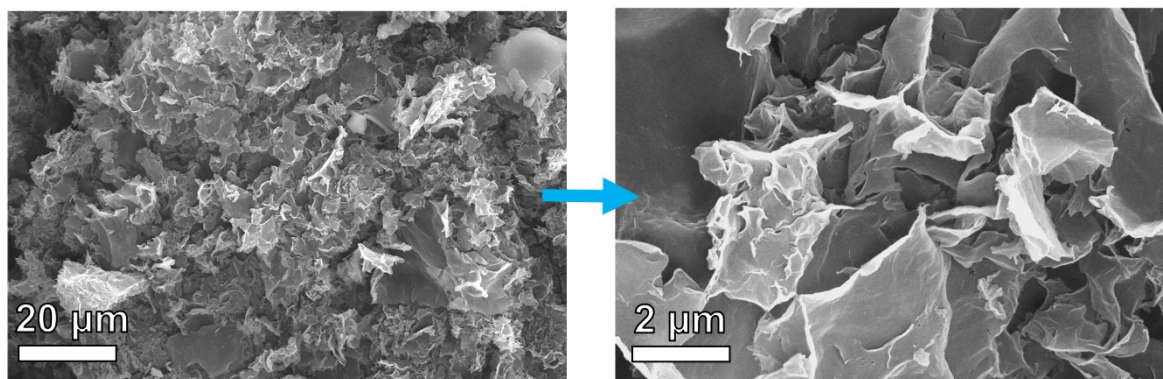

Fig. S2 SEM images of Li-RGO-400 with the LiCl concentration of  $19.7 \text{ mol L}^{-1}$ .

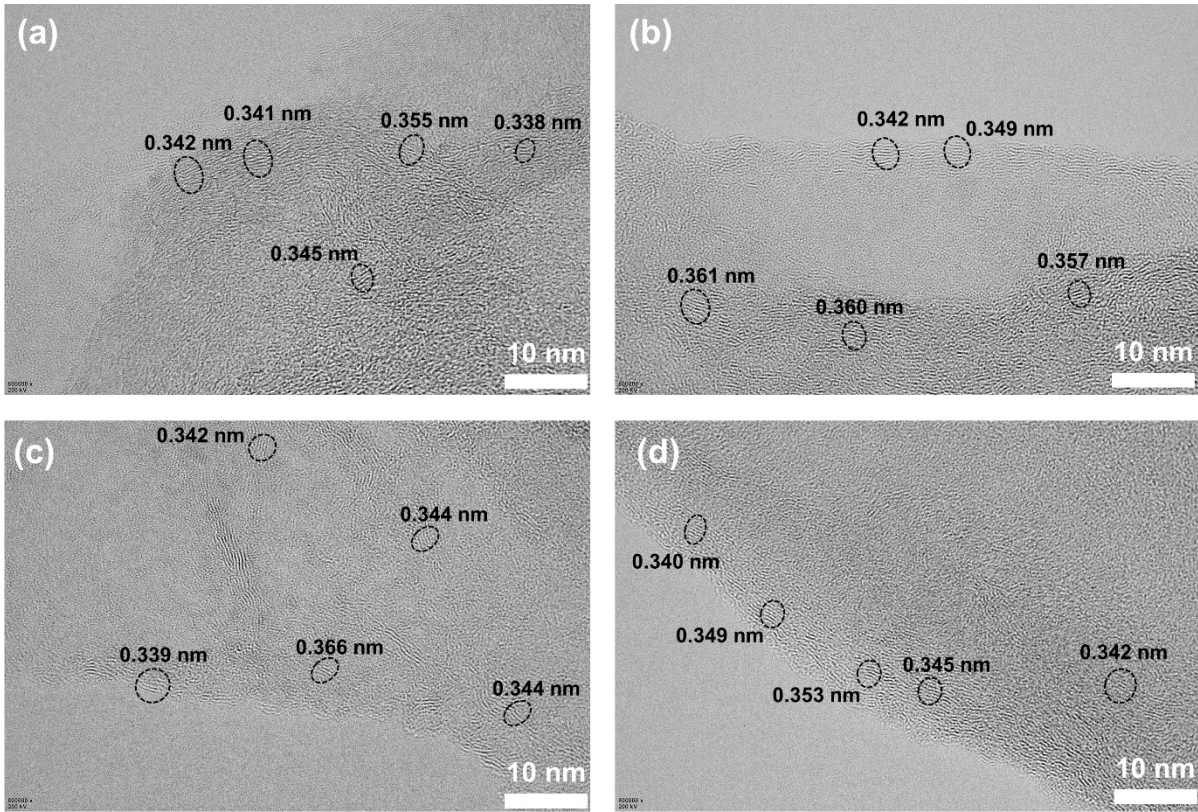

Fig. S3 (a)-(d) HRTEM images of Li-RGO-400 at different regions

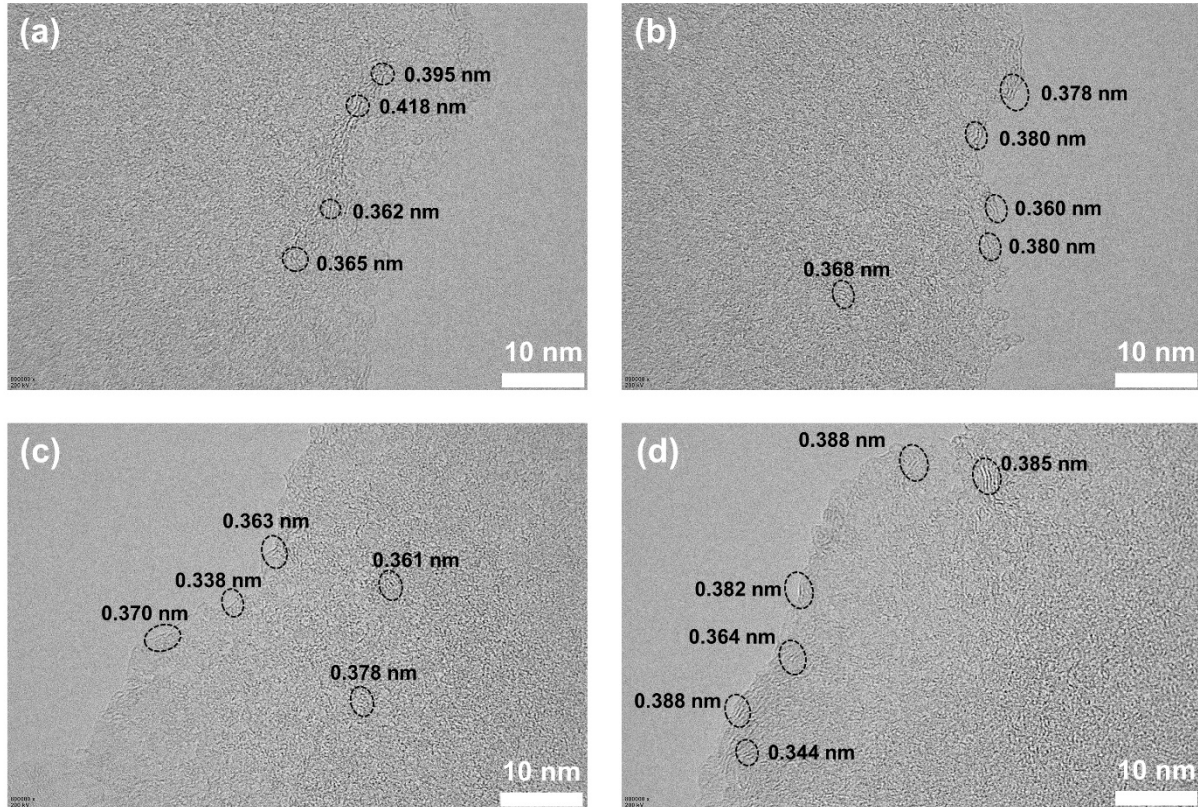

Fig. S4 (a)-(d) HRTEM images of Ar-RGO-400 at different regions



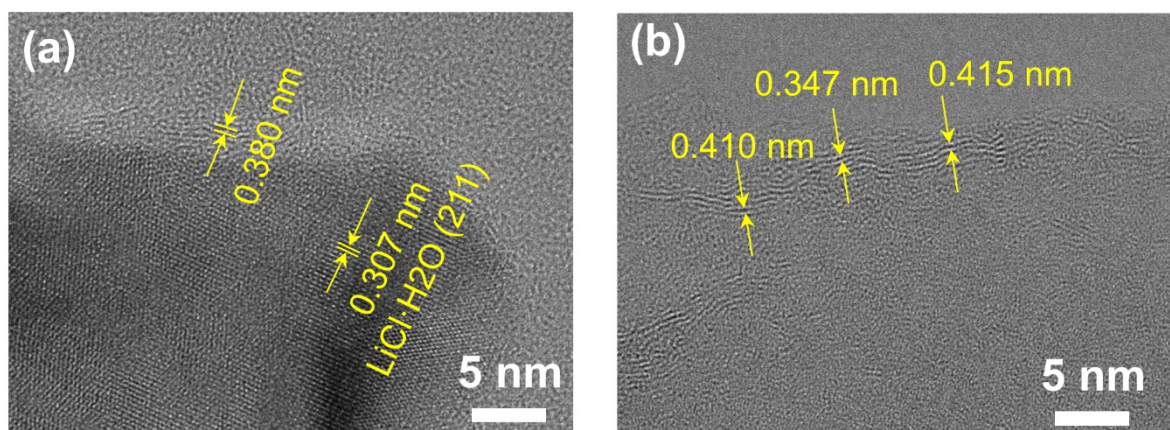

Fig. S5 TEM images of Li-RGO-400 before washing.

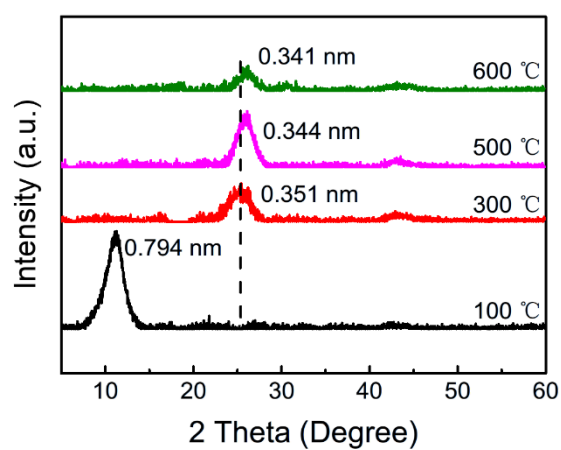

Fig. S6 XRD spectra of Li-RGOs prepared at different heat treatment temperatures.

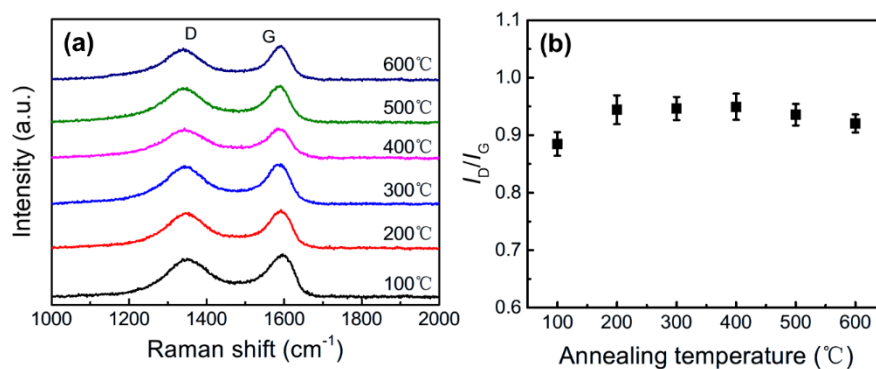

Fig. S7 (a) Raman spectra of Li-RGOs prepared with different heat treatment temperature. (b)

The relationship of  $I_D/I_G$  ratio with annealing temperature.

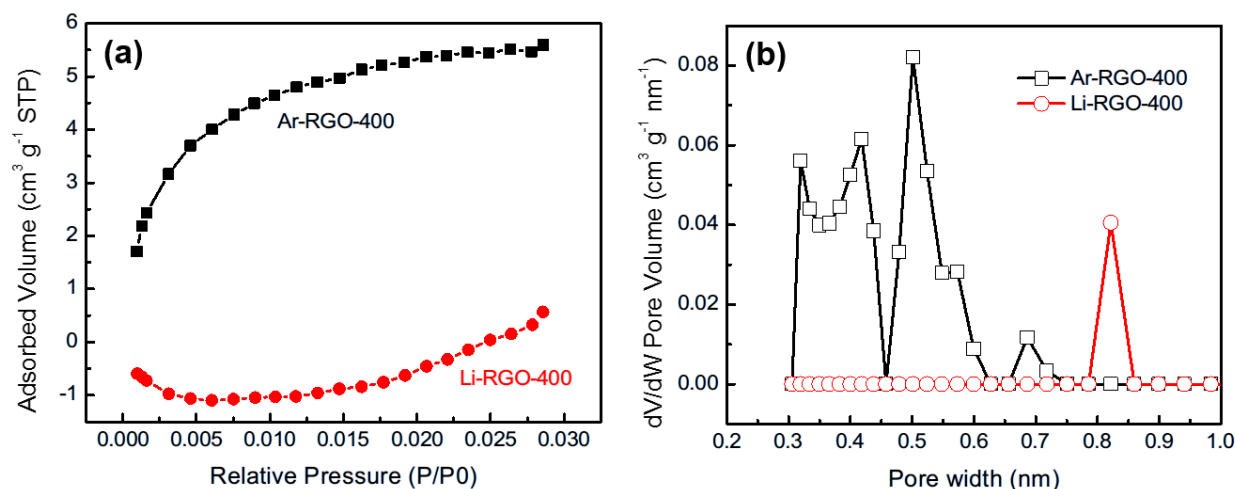

Fig. S8 (a) CO<sub>2</sub> adsorption isotherms of Ar-RGO-400 and Li-RGO-400. (b) Pore-size distribution calculated by nonlocal density functional density (NLDFT) model.

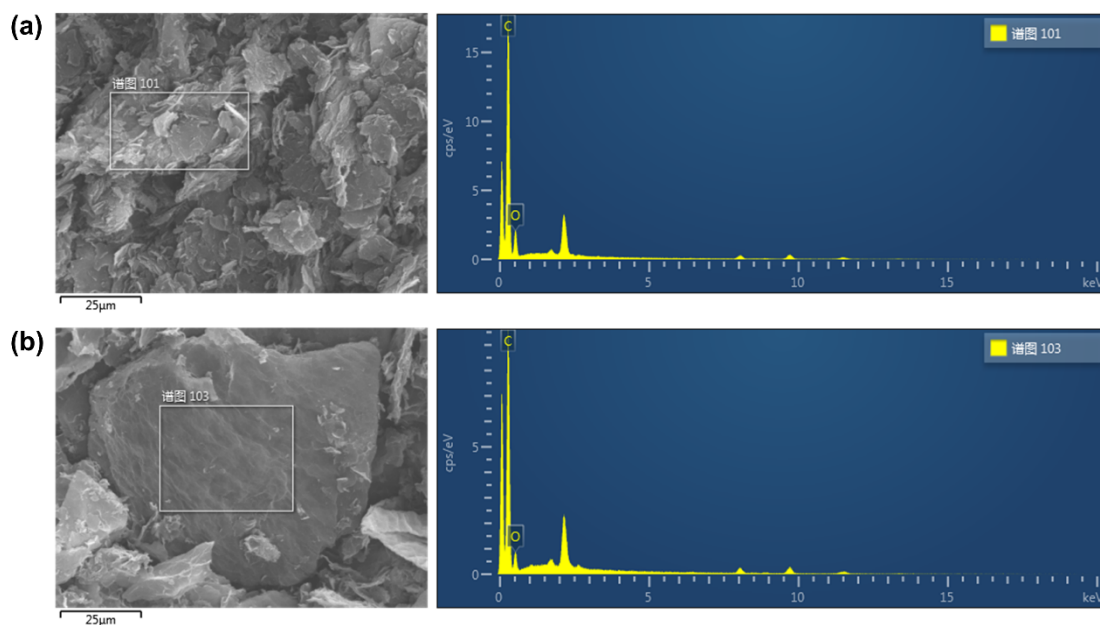

Fig. S9 The EDS spectra of (a) Ar-RGO-400 and (b) Li-RGO-400. The O content of Li-RGO-400 and Ar-RGO-400 are 15.37 at.% and 18.99 at.%, respectively.

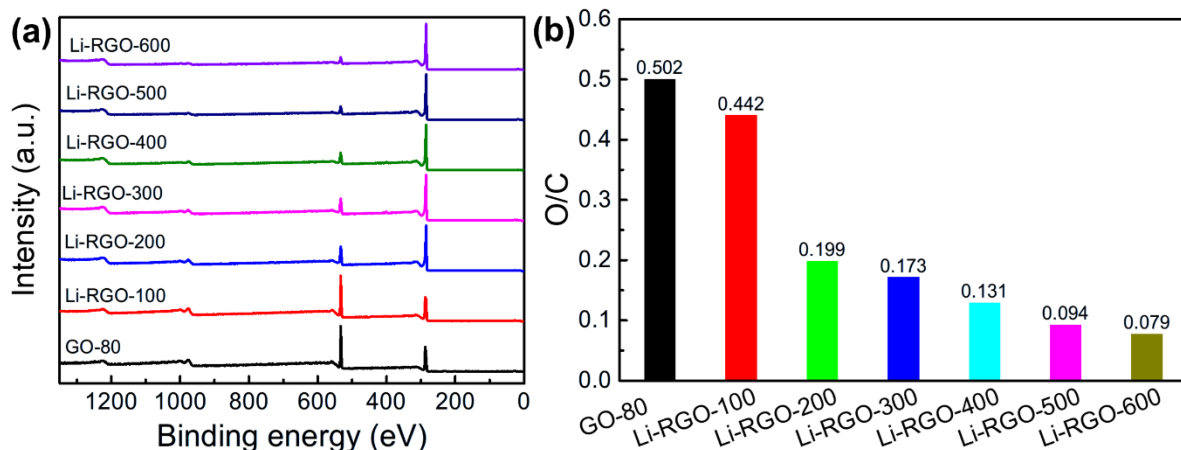

Fig. S10 (a) XPS surveys and (b) O/C ratios of Li-RGOs prepared at different heat treatment temperature.

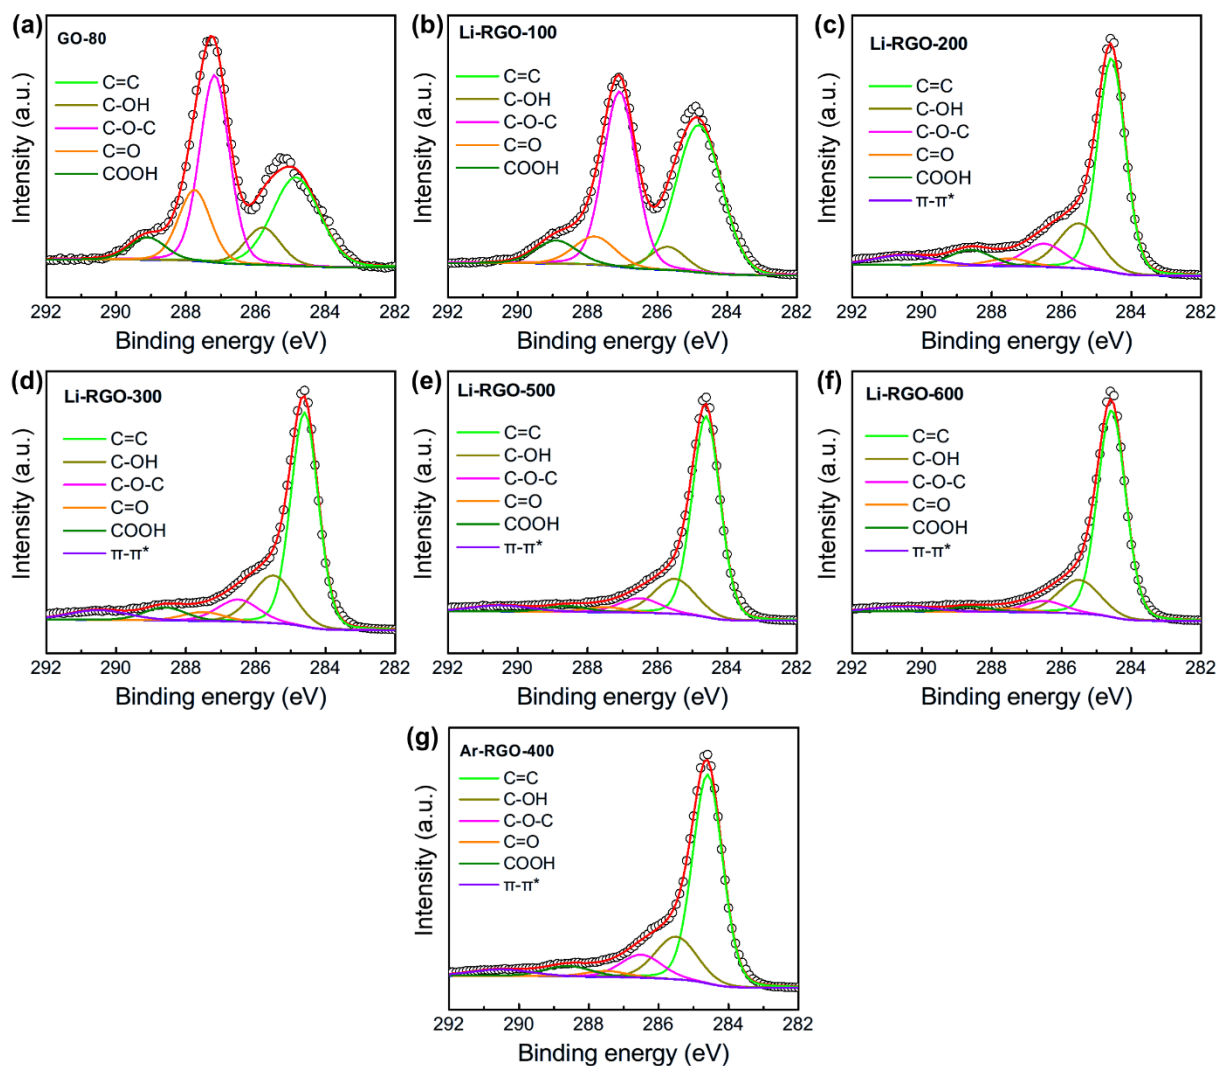

Fig. S11 (a) C 1s high-resolution spectra of Li-RGOs prepared at different heat treatment

temperatures.

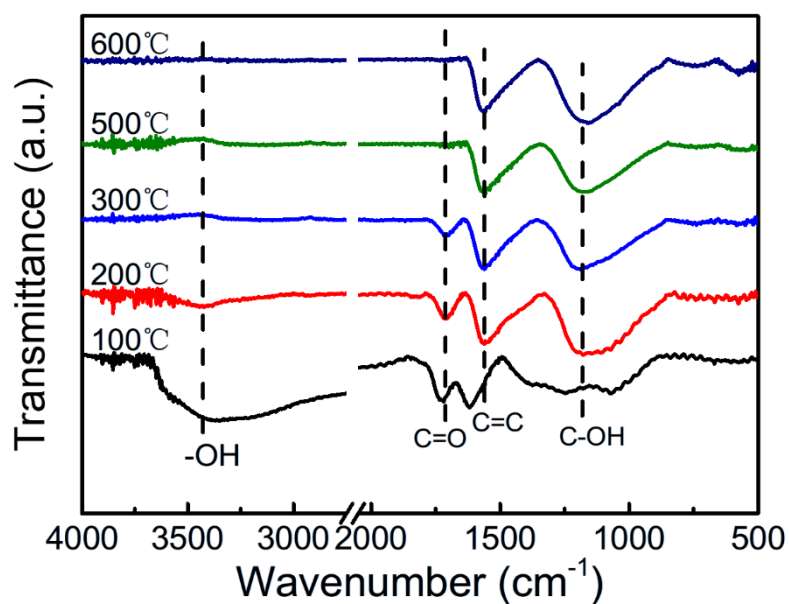

Fig. S12 The FTIR spectrum of Li-RGOs prepared with different heat treatment temperature.

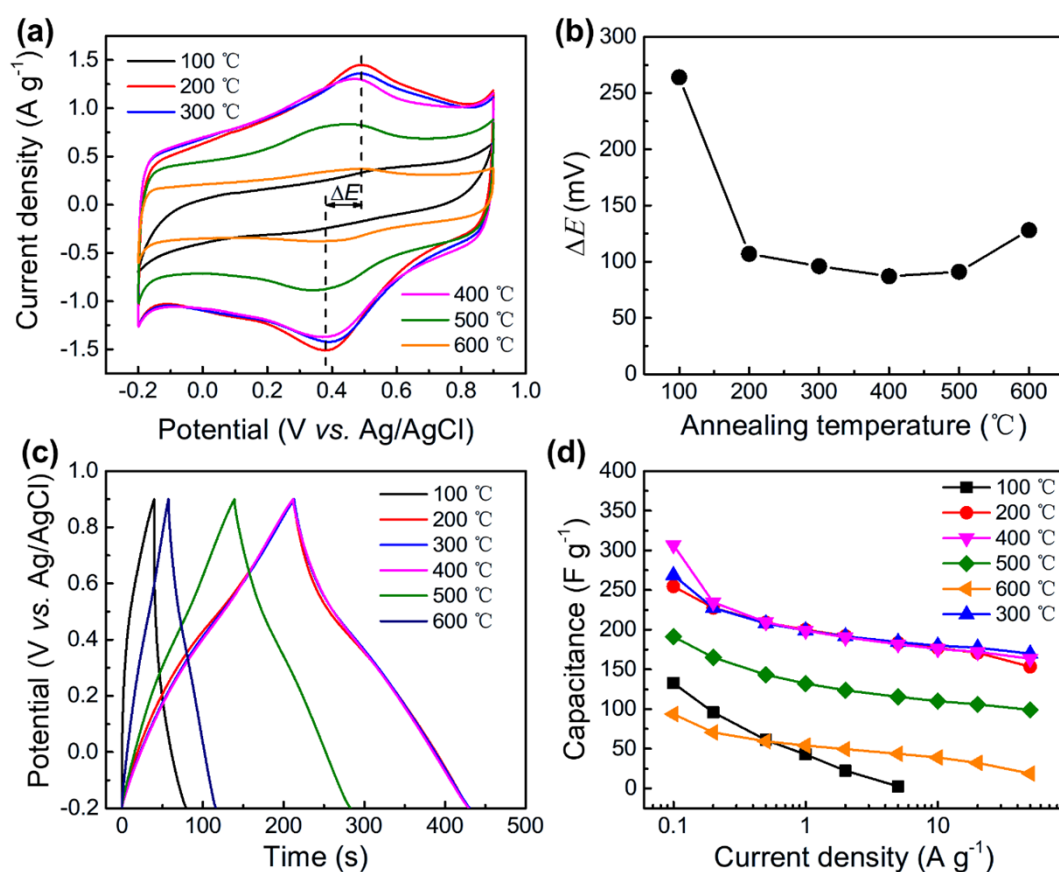

Fig. S13 (a) CV curves comparison of Li-RGOs at 5 mV s<sup>-1</sup>. (b) Relationships of separation of redox peaks  $\Delta E$  with the annealing temperatures. (c) GCD curves comparison of Li-RGOs at 1

A  $\text{g}^{-1}$ . (d) Comparison of the specific capacitance of Li-RGOs at various current densities.

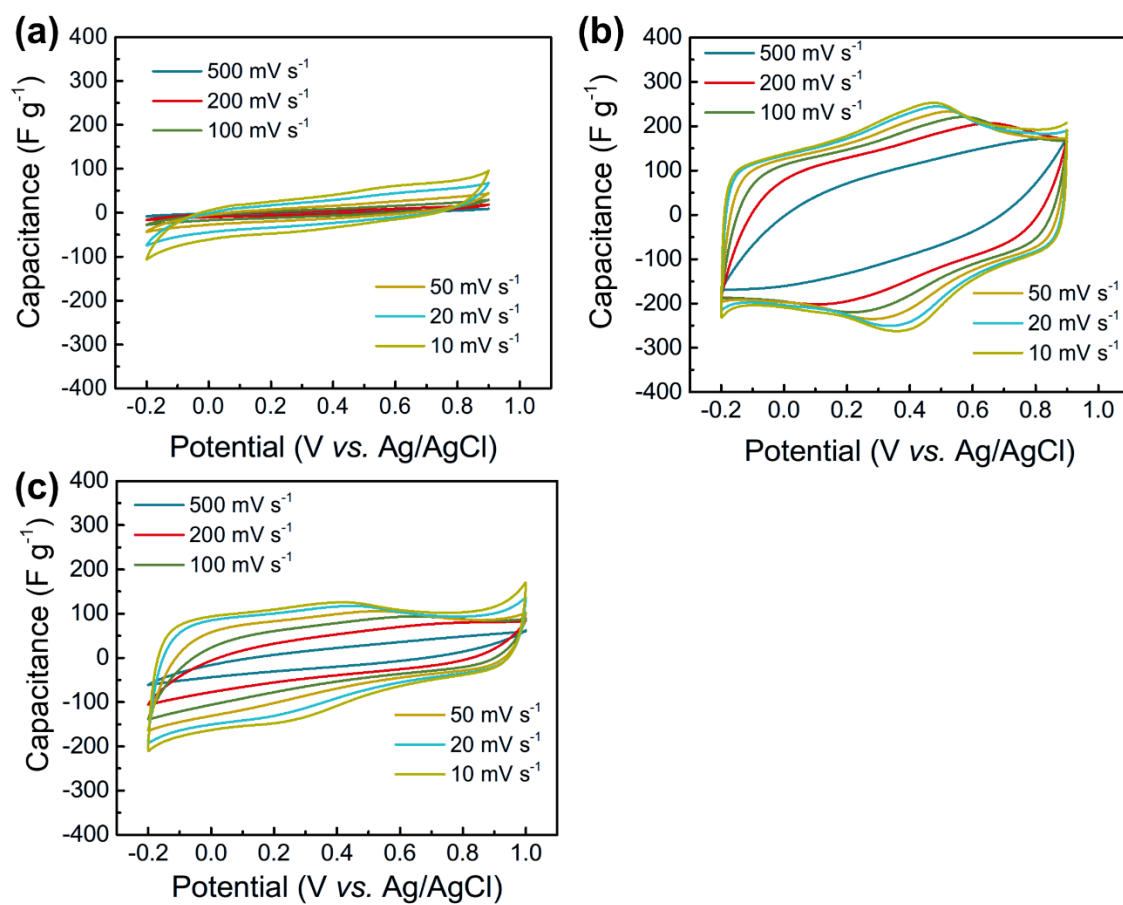

Fig. S14 CV curves of (a) Li-RGO-400 and (b) Ar-RGO-400 at different scan rates.

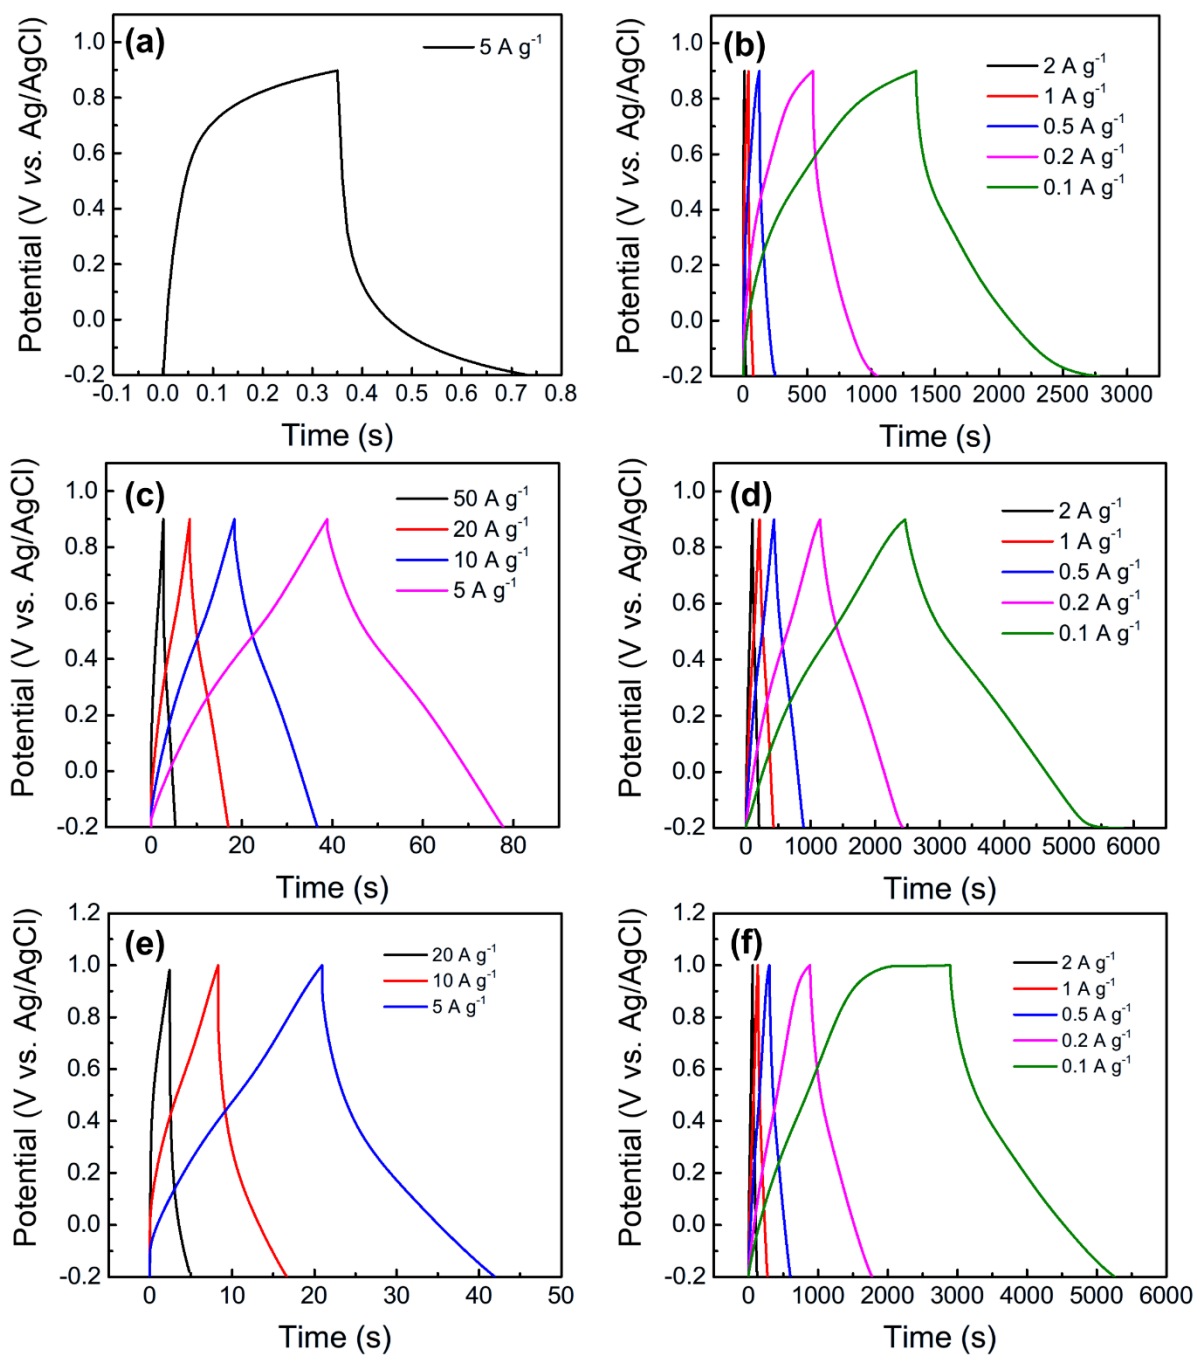

Fig. S15 (a)-(b) GCD curves of GO-80 at different current densities. (c)-(d) GCD curves of Li-RGO-400 at different current densities. (e)-(f) GCD curves of Ar-RGO-400 at different current densities.

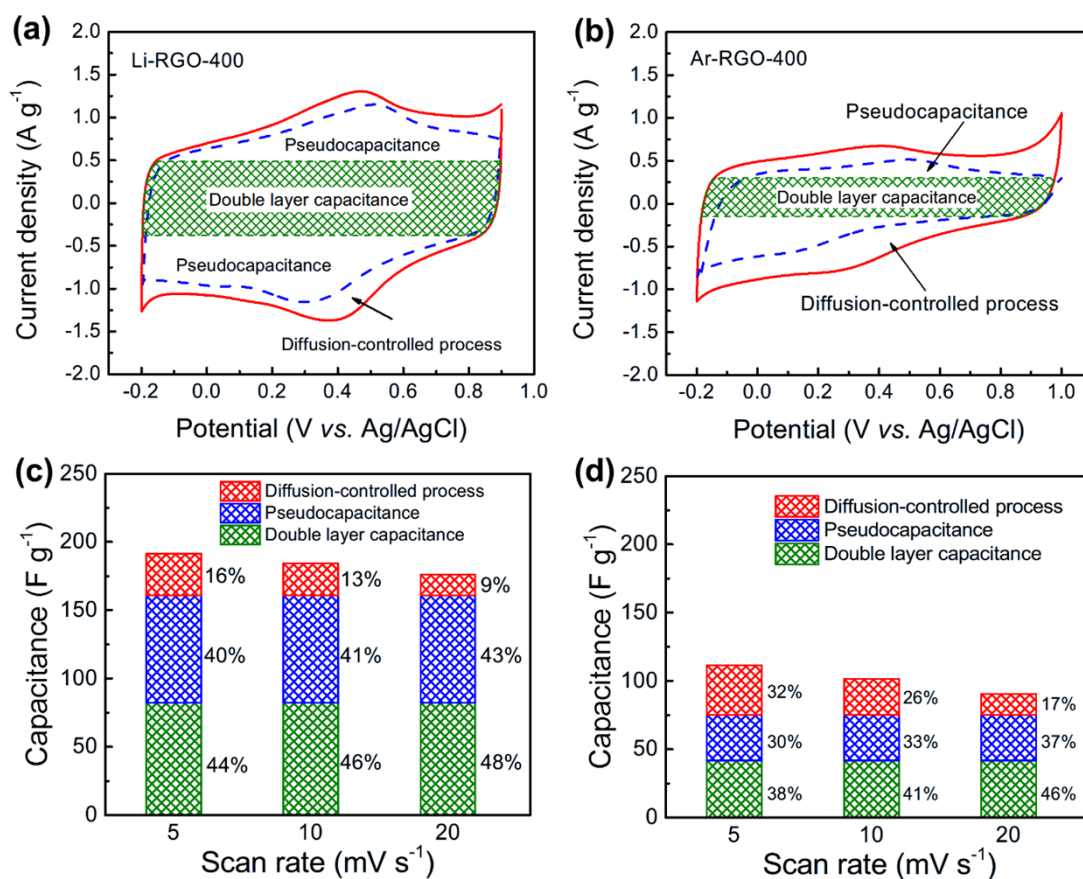

Fig. S16 The mechanisms of charge storage. Decoupling of the capacitance contributed by double layer capacitance, pseudocapacitance and diffusion-controlled process of (a) Li-RGO-400 and (b) Ar-RGO-400. Histograms of the capacitance contributions at different scan rates of (c) Li-RGO-400 and (d) Ar-RGO-400.

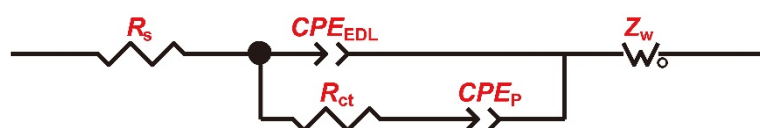

Fig. S17 The equivalent electric circuit model used for fitting the Nyquist plots.  $R_s$ : the intrinsic ohmic resistance;  $R_{ct}$ : charge transfer resistance;  $CPE_{EDL}$ : constant phase element representing the electrical double layer capacitance (EDLC);  $CPE_P$ : constant phase element representing the pseudocapacitance provided by the oxygen functional groups;  $Z_w$ : a Generalized Finite Warburg element terminating in an open circuit. The specific values for each component were listed in Table S4.

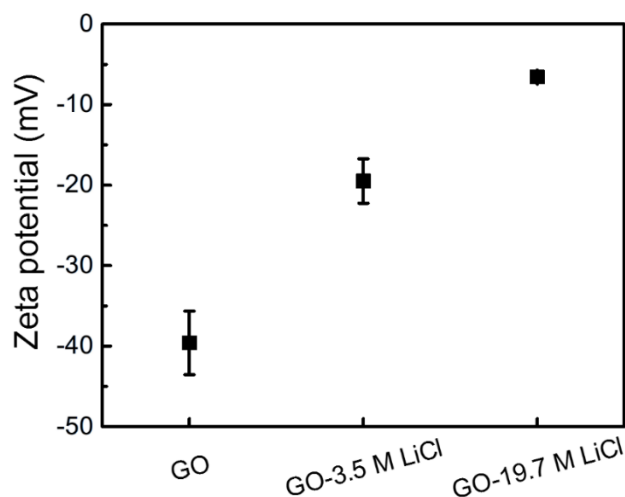

Fig. S18 Zeta potential of GO and GO with addition LiCl.

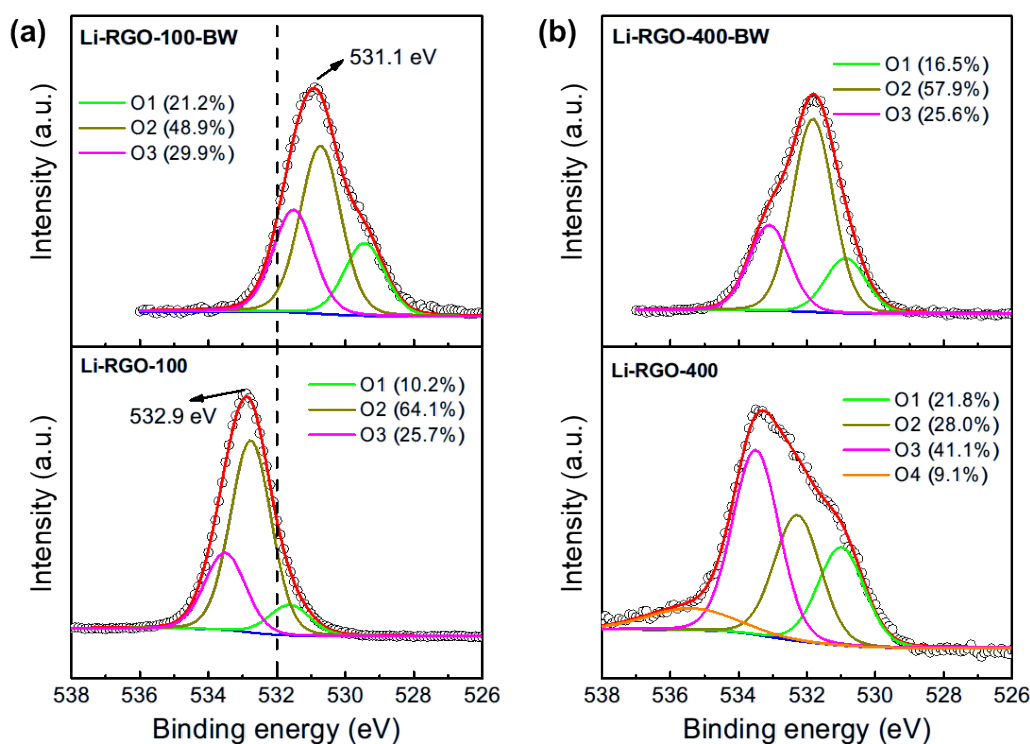

Fig. S19 The evidences of interactions of metal cations with graphene. (a) The O 1s high resolution spectra of Li-RGO-100 before (top plane) and after (bottom plane) washing off LiCl. (b) The O 1s high resolution spectra of Li-RGO-400 before (top plane) and after (bottom plane) washing off LiCl.

The interaction of  $\text{Li}^+$  with OFGs can be demonstrated by O 1s spectra in XPS. Fig. S19 displays the O 1s fine plots of Li-RGO-100 and Li-RGO-400 samples before and after removal



of LiCl, all the peak positions were corrected with C 1s = 284.6 eV. In the case of Li-RGO-100, the main O 1s peak position locates at 532.9 eV, as shown in bottom plane in Fig. S19a. However, the peak position before water washing (Li-RGO-100-BW) was down-shifted to 531.1 eV, as shown in top plane. This down-shift of the binding energy of O 1s may be due to the interaction of Li<sup>+</sup> with the OFGs, resulting in a lower binding energy between the oxygen and carbon atom. <sup>4</sup> Furthermore, O 1s high-resolution spectra unveil the protection mechanism of Li<sup>+</sup> to C-OH group. The O 1s high-resolution spectrum can be divided into four peaks: O1 corresponding to C=O or Li-O, O2 corresponding to C-O-C or C-O-Li, <sup>5</sup> O3 corresponding to C-OH, and O4 corresponding to oxygen around the vacancies on the graphene basal plane. Some C=O and C-OH were converted to C-O-Li as the heat temperature increased from 100 °C to 400 °C, demonstrating by the comparison of the O1s spectra of Li-RGO-400-BW and Li-RGO-100-BW. After washing, the relative content of C-OH increased in Li-RGO-400 as shown in Fig. S19b, which can be attributed to the hydrolysis reaction of C-O-Li.

**Table S1** The parameters of specific surface area and total pore volume calculated from nitrogen adsorption measurements.

| Samples           | BET SSA<br>(m <sup>2</sup> g <sup>-1</sup> ) | Total pore volume<br>(cm <sup>3</sup> g <sup>-1</sup> ) | Packing density<br>(g cm <sup>-3</sup> ) |
|-------------------|----------------------------------------------|---------------------------------------------------------|------------------------------------------|
| <b>GO-80</b>      | 144                                          | 0.156                                                   | 1.52                                     |
| <b>Ar-RGO-400</b> | 331                                          | 0.626                                                   | 0.89                                     |
| <b>Li-RGO-400</b> | 87                                           | 0.099                                                   | 1.67                                     |

**Table S2** The contents of oxygen functional groups of GO-80 and Li-RGOs estimated by the XPS area in C 1s peak. (Unit: at.%)

| Samples    | C=C  | C-OH | C-O-C | C=O  | HO-C=O | $\pi$ - $\pi^*$ |
|------------|------|------|-------|------|--------|-----------------|
| GO-80      | 29.7 | 9.3  | 39.3  | 16.0 | 5.6    | --              |
| Li-RGO-100 | 42.3 | 5.5  | 38.0  | 7.8  | 6.4    | --              |
| Li-RGO-200 | 57.6 | 18.1 | 9.3   | 3.1  | 6.3    | 5.6             |
| Li-RGO-300 | 57.4 | 19.2 | 8.9   | 3.6  | 5.2    | 5.7             |
| Li-RGO-400 | 61.0 | 19.5 | 7.9   | 3.1  | 3.9    | 4.6             |
| Li-RGO-500 | 66.2 | 17.1 | 7.0   | 2.5  | 2.9    | 4.3             |
| Li-RGO-600 | 69.6 | 16.7 | 5.7   | 1.8  | 2.6    | 3.6             |

**Table S3** Comparison of the rate stability of Li-RGO-400 with other reported carbon-based materials

| Materials  | Electrolyte                       | Scan rate or current density | Capacitance (F g <sup>-1</sup> ) | Rate capability              | Reference        |
|------------|-----------------------------------|------------------------------|----------------------------------|------------------------------|------------------|
| CNC700     | 1M H <sub>2</sub> SO <sub>4</sub> | 0.1 A g <sup>-1</sup>        | 260                              | 43% @ 100 A g <sup>-1</sup>  | <u>6</u>         |
| IPGEs      | 1M H <sub>2</sub> SO <sub>4</sub> | 10 mV s <sup>-1</sup>        | 132                              | 36% @ 500 mV s <sup>-1</sup> | <u>7</u>         |
| HCP        | 1M H <sub>2</sub> SO <sub>4</sub> | 1 A g <sup>-1</sup>          | 140                              | 40% @ 64 A g <sup>-1</sup>   | <u>8</u>         |
| PrGO-IL    | 1M H <sub>2</sub> SO <sub>4</sub> | 0.5 A g <sup>-1</sup>        | 262                              | 67% @ 20 A g <sup>-1</sup>   | <u>9</u>         |
| FG1.3      | 1M H <sub>2</sub> SO <sub>4</sub> | 1 A g <sup>-1</sup>          | 279                              | 54% @ 100 A g <sup>-1</sup>  | <u>10</u>        |
| aGA-0.5    | 1M H <sub>2</sub> SO <sub>4</sub> | 0.2 A g <sup>-1</sup>        | 204                              | 69% @ 30 A g <sup>-1</sup>   | <u>11</u>        |
| RGO-MP40   | 1M H <sub>2</sub> SO <sub>4</sub> | 0.1 A g <sup>-1</sup>        | 312                              | 66% @ 50 A g <sup>-1</sup>   | <u>12</u>        |
| Ar-RGO-400 | 1M H <sub>2</sub> SO <sub>4</sub> | 0.1 A g <sup>-1</sup>        | 198                              | 34% @ 20 A g <sup>-1</sup>   | <b>This work</b> |
| Li-RGO-400 | 1M H <sub>2</sub> SO <sub>4</sub> | 0.1 A g <sup>-1</sup>        | 303                              | 56% @ 20 A g <sup>-1</sup>   |                  |

Table S4 The specific values for each component of the fitted electric circuit model

| Element         | Ar-RGO-400 | Li-RGO-400 |
|-----------------|------------|------------|
| $R_s$ , /ohm    | 0.8232     | 0.9288     |
| $CPE_{EDL-T}$   | 0.0007     | 0.0015     |
| $CPE_{EDL-P}$   | 0.8827     | 0.8635     |
| $R_{ct}$ , /ohm | 1.5460     | 0.0122     |
| $CPE_P-T$       | 10.5900    | 0.0709     |
| $CPE_P-P$       | 1.4850     | 0.0107     |
| $Z_w-R$ , /ohm  | 11.0600    | 0.0475     |
| $Z_w-T$         | 1.3960     | 0.2354     |
| $Z_w-P$         | 0.4178     | 0.0150     |

**Table S5** The electrochemical performance of representative carbon electrodes.

| Material                                            | Mass loading (mg cm <sup>-2</sup> ) | Packing density (g cm <sup>-3</sup> ) | Current density         | Gravimetric capacitance (F g <sup>-1</sup> ) | Volumetric capacitance (F cm <sup>-3</sup> ) | Electrode configuration | Electrolyte                         | Reference |
|-----------------------------------------------------|-------------------------------------|---------------------------------------|-------------------------|----------------------------------------------|----------------------------------------------|-------------------------|-------------------------------------|-----------|
| Li-RGO-400                                          | 3                                   | 1.67                                  | 0.1 A g <sup>-1</sup>   | 307                                          | 512                                          | 3 electrode             | 1 M H <sub>2</sub> SO <sub>4</sub>  | This work |
| 3D carbon composite                                 | 56.9                                | 0.256                                 | 10 mV s <sup>-1</sup>   | 161                                          | 41.3                                         | 3 electrode             | 6 M KOH                             | <u>13</u> |
| N-doped graphene film                               | 0.32                                | 1.64                                  | 1 A g <sup>-1</sup>     | 252                                          | 413                                          | 2 electrode             | 1 M H <sub>2</sub> SO <sub>4</sub>  | <u>14</u> |
|                                                     | 11.2                                | 1.64                                  | 1 A g <sup>-1</sup>     | 226                                          | 370                                          | 2 electrode             | 1 M H <sub>2</sub> SO <sub>4</sub>  |           |
| rGO/SWCNT film                                      | 6.2                                 | 1.59                                  | 114 mA cm <sup>-3</sup> | 255                                          | 407                                          | 2 electrode             | H <sub>2</sub> SO <sub>4</sub> /PVA | <u>15</u> |
| Multilayered-folded graphene nanoribbon film        | 21                                  | 0.92                                  | 5 mA cm <sup>-2</sup>   | 318                                          | 293                                          | 3 electrode             | 6 M KOH                             | <u>16</u> |
| Activated wood carbon                               | 30                                  | 0.38                                  | 1 mA cm <sup>-2</sup>   | 118.7                                        | 44.8                                         | 3 electrode             | 1 M Na <sub>2</sub> SO <sub>4</sub> | <u>17</u> |
| Activated Carbon/Graphene Hybrid Aerogels           | ~10                                 | 0.58                                  | 0.05 A g <sup>-1</sup>  | 294                                          | 170.5                                        | 2 electrode             | 6 M KOH                             | <u>18</u> |
| N- and O-enriched porous carbon/graphene composites | 3                                   | 0.47                                  | 0.1 A g <sup>-1</sup>   | 380                                          | 178                                          | 2 electrode             | 6 M KOH                             | <u>19</u> |
| Nitrogen-Doped Mesoporous Carbons                   | 4.0                                 | 1.36                                  | 0.1 A g <sup>-1</sup>   | 147                                          | 200                                          | 2 electrode             | 1 M H <sub>2</sub> SO <sub>4</sub>  | <u>20</u> |
| carbon/graphene nanofibers@graphene composite cloth | 3                                   | 1.2                                   | 0.2 A g <sup>-1</sup>   | 241                                          | 294                                          | 3 electrode             | 6 M KOH                             | <u>21</u> |
| nitrogen-enriched porous carbon/graphene            | 3                                   | 1.08                                  | 0.05 A g <sup>-1</sup>  | 339                                          | 365                                          | 2 electrode             | 6 M KOH                             | <u>22</u> |
| Nitrogen-doped graphene                             | 2.0                                 | 1.31                                  | 0.5 A g <sup>-1</sup>   | 334                                          | 437.5                                        | 3 electrode             | 6 M KOH                             | <u>23</u> |
| nitrogen doped holey graphene                       | 2.0                                 | 1.30                                  | 0.1 A g <sup>-1</sup>   | 375                                          | 439                                          | 3 electrode             | 6 M KOH                             | <u>24</u> |
| graphene films                                      | 0.8                                 | 1.6                                   | 1 A g <sup>-1</sup>     | 340                                          | 326                                          | 3 electrode             | 1 M H <sub>2</sub> SO <sub>4</sub>  | <u>25</u> |

| Material                                                 | Mass loading (mg cm <sup>-2</sup> ) | Packing density (g cm <sup>-3</sup> ) | Current density        | Gravimetric capacitance (F g <sup>-1</sup> ) | Volumetric capacitance (F cm <sup>-3</sup> ) | Electrode configuration | Electrolyte                        | Reference |
|----------------------------------------------------------|-------------------------------------|---------------------------------------|------------------------|----------------------------------------------|----------------------------------------------|-------------------------|------------------------------------|-----------|
|                                                          | 2.84                                | 0.11                                  | 1 A g <sup>-1</sup>    | 213                                          | 25.41                                        | 3 electrode             | 1 M H <sub>2</sub> SO <sub>4</sub> |           |
| <b>nitrogen-doped active carbon/ graphene composites</b> | 3                                   | 0.68                                  | 0.05 A g <sup>-1</sup> | 378.9                                        | 257.7                                        | 3 electrode             | 6 M KOH                            | <u>26</u> |
| <b>Reduced Graphene Oxide Hydrogels</b>                  | 1.92                                | 1.32                                  | 1 A g <sup>-1</sup>    | 133.7                                        | 176.5                                        | 2 electrode             | 6 M KOH                            | <u>27</u> |
| <b>carbon quantum dots</b>                               | 5.16                                | 1.23                                  | 0.5 A g <sup>-1</sup>  | 128                                          | 157.4                                        | 2 electrode             | 6 M KOH                            | <u>28</u> |
| <b>holey reduced graphene oxide</b>                      | 1.5                                 | 0.86                                  | 1 A g <sup>-1</sup>    | 251                                          | 216                                          | 3 electrode             | 6 M KOH                            | <u>29</u> |
| <b>holey graphene oxide</b>                              | 1.0                                 | 1.12                                  | 1 A g <sup>-1</sup>    | 209                                          | 234                                          | 2 electrode             | 1 M H <sub>2</sub> SO <sub>4</sub> | <u>30</u> |
| <b>Functional Pillared Graphene Frameworks</b>           | 2                                   | 1.5                                   | 2 mV s <sup>-1</sup>   | 353                                          | 400                                          | 3 electrode             | 6 M KOH                            | <u>31</u> |
| <b>carbon hollow submicron spheres</b>                   | 0.2                                 | 0.87                                  | 0.2 A g <sup>-1</sup>  | 386                                          | 335                                          | 3 electrode             | 6 M KOH                            | <u>32</u> |
| <b>graphene nanomesh-carbon nanotube hybrid film</b>     | 0.5                                 | 1.13                                  | 5 mV s <sup>-1</sup>   | 294                                          | 331                                          | 3 electrode             | 6 M KOH                            | <u>33</u> |
| <b>Holey graphene frameworks</b>                         | 1                                   | 0.71                                  | 1 A g <sup>-1</sup>    | 310                                          | 220                                          | 2 electrode             | 6 M KOH                            | <u>34</u> |
| <b>Crumpled graphene balls</b>                           | 20                                  | 0.5                                   | 0.1 A g <sup>-1</sup>  | 150                                          | 75                                           | 2 electrode             | 5 M KOH                            | <u>35</u> |
| <b>Liquid-mediated chemically converted graphene</b>     | 1                                   | 1.33                                  | 0.1 A g <sup>-1</sup>  | 191.7                                        | 255.5                                        | 2 electrode             | 1 M H <sub>2</sub> SO <sub>4</sub> | <u>36</u> |
|                                                          | 1                                   | 1.33                                  | 0.1 A g <sup>-1</sup>  | 196.5                                        | 261.3                                        | 2 electrode             | EMIMBF <sub>4</sub> /AN            |           |
|                                                          | 10                                  | 1.25                                  | 0.1 A g <sup>-1</sup>  | 164                                          | 205                                          | 2 electrode             | EMIMBF <sub>4</sub> /AN            |           |
| <b>reduced graphene oxide fiber fabrics</b>              | 9                                   | 0.41                                  | 1 mA cm <sup>-2</sup>  | 285                                          | 117                                          | 3 electrode             | 1 M H <sub>2</sub> SO <sub>4</sub> | <u>37</u> |
| <b>EGM-rGO film</b>                                      | 15                                  | 0.94                                  | 1 A g <sup>-1</sup>    | 201                                          | 189                                          | 2 electrode             | EMIMBF <sub>4</sub>                | <u>38</u> |

| Material                                                               | Mass loading (mg cm <sup>-2</sup> ) | Packing density (g cm <sup>-3</sup> ) | Current density        | Gravimetric capacitance (F g <sup>-1</sup> ) | Volumetric capacitance (F cm <sup>-3</sup> ) | Electrode configuration | Electrolyte                        | Reference          |
|------------------------------------------------------------------------|-------------------------------------|---------------------------------------|------------------------|----------------------------------------------|----------------------------------------------|-------------------------|------------------------------------|--------------------|
| Highly ordered and compact porous carbon                               | 2                                   | 1.48                                  | 0.1 A g <sup>-1</sup>  | 255                                          | 378                                          | 3 electrode             | 1 M ZnSO <sub>4</sub>              | <a href="#">39</a> |
| Highly ordered graphene solid (HOGS)                                   | 2                                   | 1.48                                  | 0.05 A g <sup>-1</sup> | 205                                          | 303                                          | 3 electrode             | 1M NaClO <sub>4</sub>              | <a href="#">40</a> |
| Reduced pillared graphene materials                                    | --                                  | 1.10                                  | 10 mV s <sup>-1</sup>  | 200                                          | 210                                          | 2 electrode             | TEABF <sub>4</sub> /AN             | <a href="#">41</a> |
| Ultramicroporous carbons (CoDCs)                                       | 2                                   | 0.97                                  | 1 A g <sup>-1</sup>    | 270                                          | 262                                          | 3 electrode             | 6 M KOH                            | <a href="#">42</a> |
| YP80/G                                                                 | --                                  | 0.76                                  | 0.2 A g <sup>-1</sup>  | 181                                          | 138                                          | 2 electrode             | 1 M EMIMBF <sub>4</sub> /AN        | <a href="#">43</a> |
| N doped graphene microspheres                                          | 1.5                                 | 1.4                                   | 0.1 A g <sup>-1</sup>  | 185                                          | 259                                          | 2 electrode             | 1 M EMIMBF <sub>4</sub> /AN        | <a href="#">44</a> |
| Cabbage-like graphene (C-GR) microsphere                               | 2.5                                 | 0.75                                  | 0.1 A g <sup>-1</sup>  | 177                                          | 117                                          | 2 electrode             | 5 M KOH                            | <a href="#">45</a> |
| Electrostatic densified activated carbon (EDAC)                        | 2                                   | 0.75                                  | 1 A g <sup>-1</sup>    | 341                                          | 256                                          | 3 electrode             | 6 M KOH                            | <a href="#">46</a> |
| Lignin-Derived Carbon nanofibers                                       | 3                                   | 0.6                                   | 0.1 A g <sup>-1</sup>  | 200                                          | 130                                          | 2 electrode             | 6 M KOH                            | <a href="#">47</a> |
| Sulfur-templated graphene assemblies (STGAs)                           | --                                  | 0.72                                  | 1 A g <sup>-1</sup>    | 150                                          | 108                                          | 2 electrode             | ionic liquid (IL)                  | <a href="#">48</a> |
| Defect-enriched graphene block DGB                                     | 2                                   | 0.917                                 | 1 A g <sup>-1</sup>    | 235                                          | 215                                          | 3 electrode             | 6 M KOH                            | <a href="#">49</a> |
| Strutted nitrogen doped hierarchical porous carbon nanosheets (SNPCNS) | 2                                   | 1.11                                  | 1 A g <sup>-1</sup>    | 355                                          | 394                                          | 3 electrode             | 1 M H <sub>2</sub> SO <sub>4</sub> | <a href="#">50</a> |

## Supplementary References

1. D. C. Marcano, D. V. Kosynkin, J. M. Berlin, A. Sinitskii, Z. Sun, A. Slesarev, L. B. Alemany, W. Lu and J. M. Tour, *ACS Nano*, 2010, **4**, 4806-4814.
2. F. Yue, G. Gao, F. Li, Y. Zheng and S. Hou, *Carbon*, 2018, **134**, 112-122.
3. J. Yan, Q. Wang, T. Wei, L. L. Jiang, M. L. Zhang, X. Y. Jing and Z. J. Fan, *Acs Nano*, 2014, **8**, 4720-4729.
4. H. Zhou and D. Zhang, *J Phys Chem Solids*, 2021, **154**.
5. R. Tataru, P. Karayaylali, Y. Yu, Y. Zhang, L. Giordano, F. Maglia, R. Jung, J. P. Schmidt, I. Lund and Y. Shao-Horn, *Journal of The Electrochemical Society*, 2018, **166**, A5090-A5098.
6. K. Xie, X. T. Qin, X. Z. Wang, Y. N. Wang, H. S. Tao, Q. Wu, L. J. Yang and Z. Hu, *Adv. Mater.*, 2012, **24**, 347-352.
7. L. T. Le, M. H. Ervin, H. W. Qiu, B. E. Fuchs and W. Y. Lee, *Electrochem. Commun.*, 2011, **13**, 355-358.
8. D. Salinas-Torres, R. Ruiz-Rosas, M. J. Valero-Romero, J. Rodriguez-Mirasol, T. Cordero, E. Morallon and D. Cazorla-Amoros, *J. Power Sources*, 2016, **326**, 641-651.
9. T. T. Li, N. Li, J. W. Liu, K. Cai, M. F. Foda, X. M. Lei and H. Y. Han, *Nanoscale*, 2015, **7**, 659-669.
10. F. Liu and D. F. Xue, *Chem. Eur. J.*, 2013, **19**, 10716-10722.
11. X. X. Sun, P. Cheng, H. J. Wang, H. Xu, L. Q. Dang, Z. H. Liu and Z. B. Lei, *Carbon*, 2015, **92**, 1-10.
12. Z. Liu, L. Wang, G. Ma, Y. Yuan, H. Jia and W. Fei, *J. Mater. Chem. A*, 2020, **8**, 18933-18944.
13. T. T. Gao, Z. Zhou, J. Y. Yu, J. Zhao, G. L. Wang, D. X. Cao, B. Ding and Y. J. Li, *Adv. Energy Mater.*, 2019, **9**, 1802578.
14. T. Q. Huang, X. Y. Chu, S. Y. Cai, Q. Y. Yang, H. Chen, Y. J. Liu, K. Gopalsamy, Z. Xu, W. W. Gao and C. Gao, *Energy Storage Materials*, 2019, **17**, 349-357.
15. J. Zhong, W. Sun, Q. Wei, X. Qian, H. M. Cheng and W. Ren, *Nat. Commun.*, 2018, **9**, 3484.
16. L. Z. Sheng, J. Chang, L. L. Jiang, Z. M. Jiang, Z. Liu, T. Wei and Z. J. Fan, *Adv. Funct. Mater.*, 2018, **28**, 1800597.
17. C. Chen, Y. Zhang, Y. Li, J. Dai, J. Song, Y. Yao, Y. Gong, I. Kierzewski, J. Xie and L. Hu, *Energy Environ. Sci.*, 2017, **10**, 538-545.
18. Q. Z. Zhu, L. Ma, H. R. Wang, M. Q. Jia, Y. B. Guan and B. Xu, *Chemistryselect*, 2017, **2**, 4456-4461.
19. S. W. Zhou, Q. X. Xie, S. H. Wu, X. L. Huang and P. Zhao, *Ionics*, 2017, **23**, 1499-1507.
20. X. Q. Yang, H. Ma and G. Q. Zhang, *Langmuir*, 2017, **33**, 3975-3981.
21. Q. X. Xie, S. W. Zhou, S. H. Wu, Y. F. Zhang and P. Zhao, *Applied Surface Science*, 2017, **407**, 36-43.

22. Q. X. Xie, G. H. Chen, R. R. Bao, Y. F. Zhang and S. H. Wu, *Microporous and Mesoporous Materials*, 2017, **239**, 130-137.
23. X. Zhao, H. W. Dong, Y. Xiao, H. Hu, Y. J. Cai, Y. R. Liang, L. Y. Sun, Y. L. Liu and M. T. Zheng, *Electrochimica Acta*, 2016, **218**, 32-40.
24. Y. J. Zhang, L. Ji, W. F. Li, Z. Zhang, L. Lu, L. S. Zhou, J. H. Liu, Y. Chen, L. W. Liu, W. Chen and Y. G. Zhang, *Journal of Power Sources*, 2016, **334**, 104-111.
25. L. L. Zhang, C. Yang, N. T. Hu, Z. Yang, H. Wei, C. X. Chen, L. M. Wei, Z. C. J. Xu and Y. F. Zhang, *Nano Energy*, 2016, **26**, 668-676.
26. Q. X. Xie, R. R. Bao, A. R. Zheng, Y. F. Zhang, S. H. Wu, C. Xie and P. Zhao, *ACS Sustain. Chem. Eng.*, 2016, **4**, 1422-1430.
27. V. H. Pham and J. H. Dickerson, *J. Phys. Chem. C*, 2016, **120**, 5353-5360.
28. G. X. Chen, S. L. Wu, L. W. Hui, Y. Zhao, J. L. Ye, Z. Q. Tan, W. C. Zeng, Z. C. Tao, L. H. Yang and Y. W. Zhu, *Scientific Reports*, 2016, **6**, 19028.
29. Y. L. Bai, X. F. Yang, Y. B. He, J. Y. Zhang, L. P. Kang, H. Xu, F. Shi, Z. B. Lei and Z. H. Liu, *Electrochimica Acta*, 2016, **187**, 543-551.
30. Y. X. Xu, C. Y. Chen, Z. P. Zhao, Z. Y. Lin, C. Lee, X. Xu, C. Wang, Y. Huang, M. I. Shakir and X. F. Duan, *Nano Lett.*, 2015, **15**, 4605-4610.
31. L. L. Jiang, L. Z. Sheng, C. L. Long, T. Wei and Z. J. Fan, *Adv. Energy Mater.*, 2015, **5**, 1500771.
32. D. Y. Guo, X. Chen, Z. P. Fang, Y. F. He, C. Zheng, Z. Yang, K. Q. Yang, Y. Chen and S. M. Huang, *Electrochim. Acta*, 2015, **176**, 207-214.
33. L. Jiang, L. Sheng, C. Long and Z. Fan, *Nano Energy*, 2015, **11**, 471-480.
34. Y. Xu, Z. Lin, X. Zhong, X. Huang, N. O. Weiss, Y. Huang and X. Duan, *Nat. Commun.*, 2014, **5**, 4554.
35. J. Luo, H. D. Jang and J. Huang, *ACS Nano*, 2013, **7**, 1464-1471.
36. X. Yang, C. Cheng, Y. Wang, L. Qiu and D. Li, *Science*, 2013, **341**, 534-537.
37. F. Shao, N. Hu, Y. Su, L. Yao, B. Li, C. Zou, G. Li, C. Zhang, H. Li, Z. Yang and Y. Zhang, *Chem. Eng. J.*, 2020, **392**, 123692.
38. Z. Li, S. Gadipelli, H. Li, C. A. Howard, D. J. L. Brett, P. R. Shearing, Z. Guo, I. P. Parkin and F. Li, *Nat. Energy*, 2020, **5**, 160-168.
39. H. Ma, H. Chen, M. Wu, F. Chi, F. Liu, J. Bai, H. Cheng, C. Li and L. Qu, *Angew. Chem. Int. Ed.*, 2020, **59**, 14541-14549.



40. H. Ma, H. Geng, B. Yao, M. Wu, C. Li, M. Zhang, F. Chi and L. Qu, *ACS Nano*, 2019, **13**, 9161-9170.
41. H. Banda, S. Perie, B. Daffos, P.-L. Taberna, L. Dubois, O. Crosnier, P. Simon, D. Lee, G. De Paepe and F. Duclairoir, *Acs Nano*, 2019, **13**, 1443-1453.
42. S. Zhang, J. Zhu, Y. Qing, L. Wang, J. Zhao, J. Li, W. Tian, D. Jia and Z. Fan, *Adv. Funct. Mater.*, 2018, **28**, 1805898.
43. P. Li, H. Li, D. Han, T. Shang, Y. Deng, Y. Tao, W. Lv and Q.-H. Yang, *Advanced Science*, 2019, **6**.
44. Y. H. Kim, B. H. Park, Y. J. Choi, G.-W. Lee, H.-K. Kim and K.-B. Kim, *Energy Storage Materials*, 2020, **24**, 351-361.
45. S. K. Kim, B. Lee, T. Ha, S.-R. Park, H. Chang, S. W. Lee and H. D. Jang, *Small*, 2018, **14**, 1801948.
46. Y. Jiang, J. Li, Z. Jiang, M. Shi, R. Sheng, Z. Liu, S. Zhang, Y. Cao, T. Wei and Z. Fan, *Carbon*, 2021, **175**, 281-288.
47. S. Herou, J. J. Bailey, M. Kok, P. Schlee, R. Jervis, D. J. L. Brett, P. R. Shearing, M. C. Ribadeneyra and M. Titirici, *Advanced Science*, 2021, 2100016.
48. J. Han, C. Zhang, D. Kong, X. He, J. Xiao, F. Chen, Y. Tao, Y. Wan and Q.-H. Yang, *Nano Energy*, 2020, **72**, 104729.
49. Y. Dong, S. Zhang, X. Du, S. Hong, S. Zhao, Y. Chen, X. Chen and H. Song, *Adv. Funct. Mater.*, 2019, **29**, 1901127.
50. C. Chen, M. Zhao, Y. Cai, G. Zhao, Y. Xie, L. Zhang, G. Zhu and L. Pan, *Carbon*, 2021, **179**, 458-468.
